# Supplementary material for: An unprecedented acylamide-functionalized 2D → 3D microporous metal–organic polycatenation framework exhibiting highly selective CO2 capture
Source: Royal Society of Chemistry journal article supplement (doi:10.1039/c3dt50997d), 2013-01-01
Supplement: c3dt50997d.pdf [file c3dt50997d.pdf]

## *Supporting Information*

### **An unprecedented acylamide-functionalized 2D→3D microporous metal–organic polycatenation framework exhibiting highly selective CO<sub>2</sub> capture**

**Bo Liu,<sup>a</sup> Dong-Sheng Li,<sup>a,b</sup> Lei Hou,<sup>a</sup> Guo-Ping Yang,<sup>a</sup> Yao-Yu Wang\*<sup>a</sup> and Qi-Zhen Shi<sup>a</sup>**

<sup>a</sup>Key Laboratory of Synthetic and Natural Functional Molecule Chemistry of the Ministry of Education, College of Chemistry & Materials Science, Northwest University, Xi'an 710069 (P. R. China).

Email: [wyaoyu@nwu.edu.cn](mailto:wyaoyu@nwu.edu.cn), Tel: 86 29 88302604

<sup>b</sup>College of Mechanical & Material Engineering, Research Institute of Materials, China Three Gorges University, Yichang, P. R. China

**Materials and Measurements.** All reagents and solvents were commercially available and were used without further purification. The 4,4',4''-[1,3,5-Benzenetriyltris(carbonylimino)]trisbenzoic acid ( $H_3bcta$ ) was synthesized according to literature procedures.<sup>1</sup> IR spectra were obtained in KBr discs on a Nicolet Avatar 360 FTIR spectrometer in the 400–4000  $cm^{-1}$  region. Elemental analyses (C, H and N) were performed with a Perkin Elmer 2400C Elemental Analyzer. Thermalgravimetric analyses (TGA) were carried out in nitrogen stream using a Netzsch TG209F3 equipment at a heating rate of 5  $^{\circ}C/min$ . Powder X-ray diffraction (PXRD) data were recorded on a Bruker D8 ADVANCE X-ray powder diffractometer (Cu  $K\alpha$ , 1.5418 Å). All the gas sorption isotherms were measured by using a ASAP 2020M adsorption equipment.

#### Synthesis of $[Zn_2(bcta)(dipy)(\mu_2-OH)] \cdot 2DMF \cdot H_2O$ (**1**)

A mixture of  $Zn(NO_3)_2 \cdot 6H_2O$  (0.2 mmol, 0.059 g),  $H_3bcta$  (0.1 mmol, 0.062 g) and dipy (0.1 mmol, 0.018 g) in DMF (6 mL) and water (2 mL) was placed in a Teflon-lined stainless steel vessel (25 mL) and heated at 120  $^{\circ}C$  for 72 h, and then cooled to room temperature at a rate of 5  $^{\circ}C min^{-1}$ . The resulting colorless block crystals of **1** were isolated by washing with DMF/ $H_2O$  and dried in air. The yield was 0.092 g (86.7%, based on  $H_3bcta$ ). Anal. Calcd for  $C_{48}H_{45}N_7O_{13}Zn_2$ : C, 54.56; H, 4.28; N, 9.26. Found: C, 54.49; H, 3.88; N, 9.32.

#### Sorption Measurements.

All the gas sorption isotherms were measured by using a ASAP 2020M adsorption equipment. The as-synthesized samples were treated by heating at 180  $^{\circ}C$  for 8 h in a quartz tube under vacuum to remove the solvent molecules prior to measurements.

#### Crystallography.

Diffraction data were collected with a Mo  $K\alpha$  radiation ( $\lambda = 0.71073$  Å) on a Bruker-AXS SMART CCD area detector diffractometer. Absorption corrections were carried out utilizing SADABS routine. The structure was solved by the direct methods and refined by full matrix least squares refinements based on  $F^2$ . All non-hydrogen atoms were refined anisotropically with the hydrogen atoms added to their geometrically ideal positions and refined isotropically. However, the hydrogen atoms of the water solvates and some DMF molecules cannot be located from the difference Fourier maps. Crystal data of **1**:  $C_{48}H_{45}N_7O_{13}Zn_2$ ,  $M = 1058.68$ , 296(2) K, monoclinic, space group  $P2_1/c$ ,  $a = 10.405(3)$  Å,  $b = 24.813(7)$  Å,  $c = 19.681(5)$ ,  $\beta = 106.200(13)^{\circ}$ ,  $V = 4879(2)$  Å<sup>3</sup>,  $Z = 4$ ,  $D_c = 1.437$  g  $cm^{-3}$ ,  $\mu = 1.054$  mm<sup>-1</sup>, 31706 reflections collected. Refinement of 8678 reflections (635 parameters) with  $I > 2\sigma(I)$  converged at final  $R_1 = 0.0559$ ,  $wR_2 = 0.1203$ , GOF = 1.011. CCDC-931075 contains the crystallographic data for this paper.

The final formulas for the complexes were determined by combining single-crystal structures, elemental microanalysis and TGA.

#### References

- 1 X. Song, Y. Zou, X. Liu, M. Oh and M. S. Lah, *New J. Chem.*, 2010, **34**, 2396–2399.

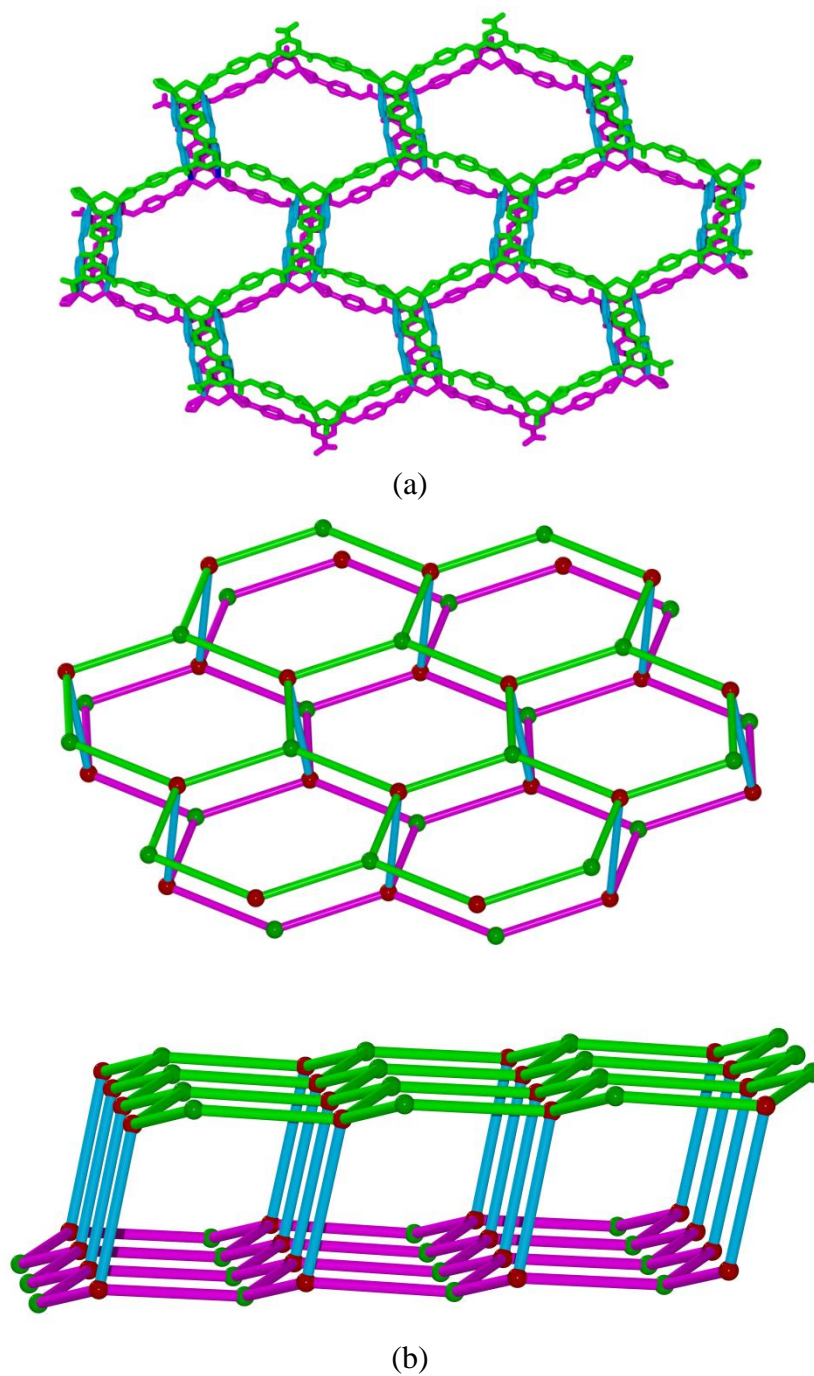

**Fig. S1** The two layers are connected by dipy to generate a bilayer (a) and its simplified net (along two different directions) (b). Note that two identical layers are highlighted in green and pink, while the pillars of dipy are colored in blue.

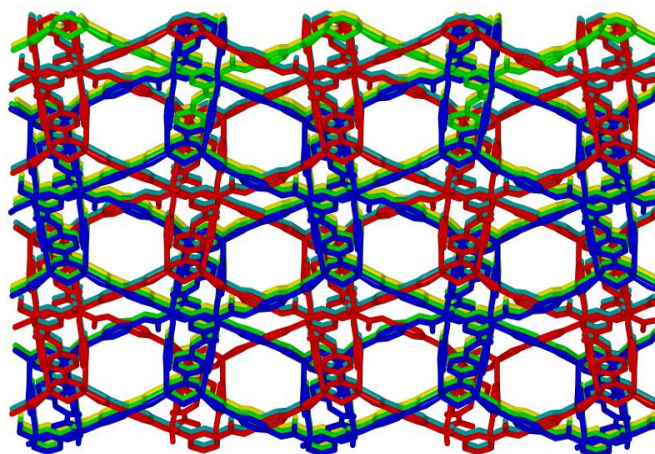

**Fig. S2** View of the 2D  $\rightarrow$  3D microporous framework of **1**: each color presents one bilayer net.

**Table S1** Summary of the linking modes of the 6-membered shortest ring within 3D net of **1**

| Cycle 1 | Cycle 2 | Chain | Cross | Mult |
|---------|---------|-------|-------|------|
| 6a      | 6a      | inf.  | 1     | 4    |
| 6a      | 6b      | inf.  | 1     | 8    |
| 6a      | 6c      | inf.  | 1     | 4    |
| 6b      | 6a      | inf.  | 1     | 8    |
| 6b      | 6c      | inf.  | 1     | 4    |
| 6c      | 6a      | inf.  | 1     | 8    |
| 6c      | 6b      | inf.  | 1     | 8    |

<sup>a</sup>Chain: the bond amount of the shortest chain that interconnected two rings.

<sup>b</sup>Cross: the times of each ring crossing another ring.

<sup>c</sup>Mult: the ring numbers of each ring crossed by other one.

### Thermogravimetric analyses (TGA) and Powder X-ray diffraction (PXRD)

The TGA curve of **1** reveals a total weight loss of 16.6% below 250 °C under N<sub>2</sub> atmosphere (Fig. S3), corresponding to the loss of two DMF and one lattice water molecules per formula unit (calcd. 15.6%). The guest molecules of **1** can also be removed by heating at 180 °C under vacuum for 8 h, which is verified by TGA and IR on the desolvated **1**. PXRD of the desolvated **1** exhibits weakening and high-angle shifting of some peaks which remains highly crystalline, implying slight framework distortion due to the solvent release (Fig. S4). However, the PXRD pattern of **1** can be reversibly restored from solvent-free **1** while the solvents were re-adsorbed.

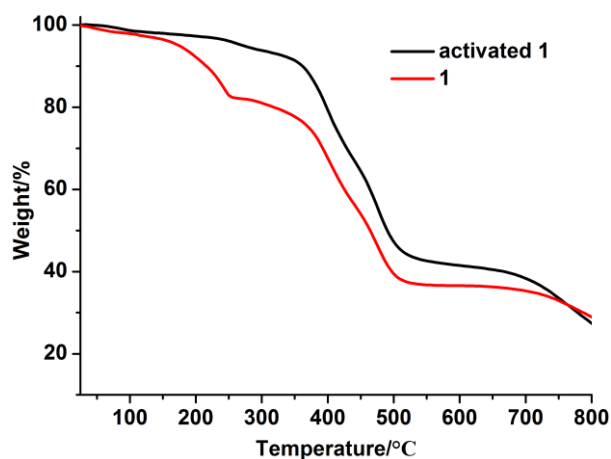

**Fig. S3** TGA curves for **1** and activated samples measured under nitrogen.

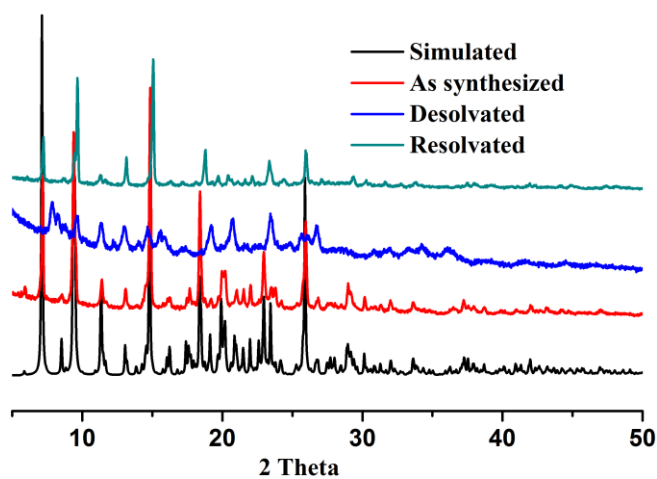

**Fig. S4** PXRD patterns of **1** simulated from the X-ray single-crystal structure, as-synthesized, desolvated and resolved samples.

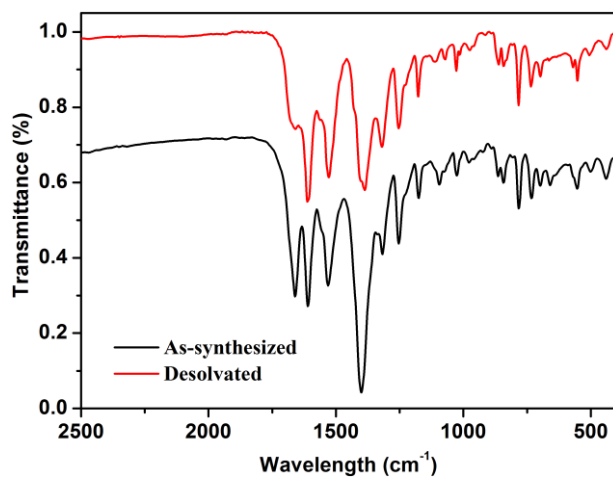

**Fig. S5** The FTIR spectra of **1** and desolvated **1** samples.

### Calculation of sorption heat for CO<sub>2</sub> uptake using Virial 2 model

$$\ln P = \ln N + 1/T \sum_{i=0}^m aiN^i + \sum_{i=0}^n biN^i \quad Q_{st} = -R \sum_{i=0}^m aiN^i$$

The above equation was applied to fit the combined CO<sub>2</sub> isotherm data for **1** at 273 and 295 K, where  $P$  is the pressure,  $N$  is the adsorbed amount,  $T$  is the temperature,  $ai$  and  $bi$  are virial coefficients, and  $m$  and  $n$  are the number of coefficients used to describe the isotherms.  $Q_{st}$  is the coverage-dependent enthalpy of adsorption and  $R$  is the universal gas constant.

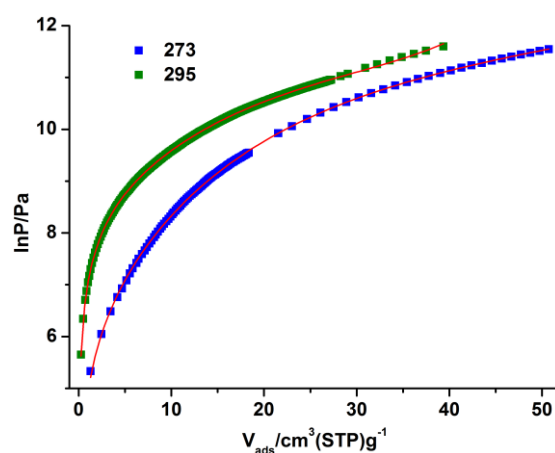

**Figure S6.** CO<sub>2</sub> adsorption isotherms for **1** with fitting by Virial 2 model. Fitting results:  $a_0 = -3635.98961$ ,  $a_1 = 53.99218$ ,  $a_2 = 7.44731$ ,  $a_3 = 11.49206$ ,  $a_4 = -4.81578 \times 10^{-5}$ ,  $b_0 = 19.21214$ ,  $b_1 = -0.16808$ ,  $b_2 = -0.02832$ ,  $b_3 = -0.04212$ .  $\chi^2 = 0.000147$ ,  $R^2 = 0.99988$ .
